# Supplementary material
Source: publisher figshare collection journal article supplement (https://acs.figshare.com/ndownloader/files/4743529)
Supplement: Supplementary file 1 [file 4743529]

## **SUPPORTING INFORMATION**

### **Preparation of Nitrogen-Substituted TiO<sub>2</sub> Thin Film Photocatalysts by the RF Magnetron Sputtering Deposition Method and their Photocatalytic Reactivity under Visible Light Irradiation**

Masaaki Kitano,<sup>†</sup> Keisho Funatsu,<sup>‡</sup> Masaya Matsuoka,<sup>‡</sup> Michio Ueshima,<sup>†</sup>  
and Masakazu Anpo,<sup>‡\*</sup>

<sup>†</sup>Industry-University Cooperation Organization, Osaka Prefecture University

1-2 Gakuen-cho, Naka-ku, Sakai, Osaka 599-8570, Japan

<sup>‡</sup>Department of Applied Chemistry, Graduate School of Engineering, Osaka Prefecture  
University

1-1 Gakuen-cho, Naka-ku, Sakai, Osaka 599-8531, Japan

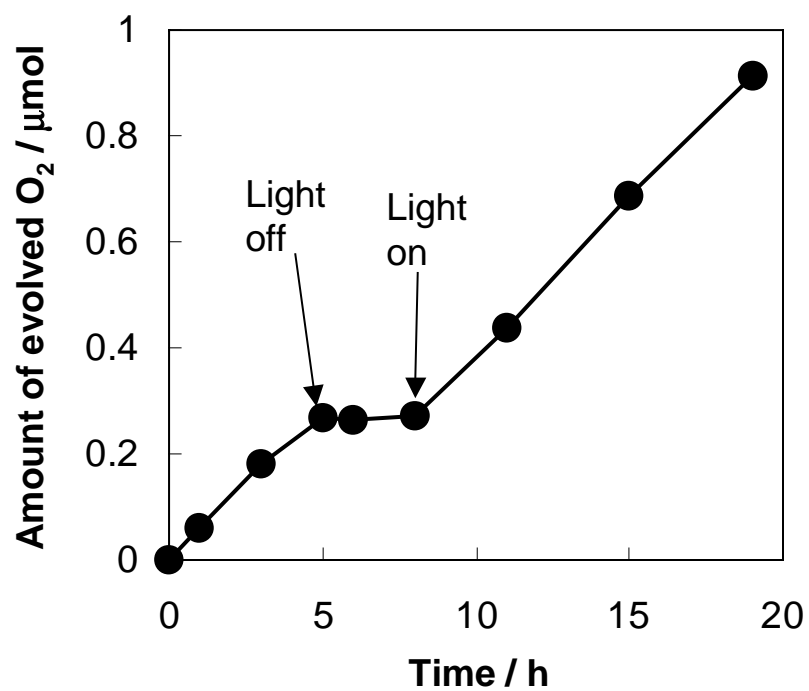

Figure S1: The reaction time profile of the photocatalytic evolution of O<sub>2</sub> from a 0.05 M AgNO<sub>3</sub> aqueous solution on Pt-loaded N-TiO<sub>2</sub>(4) under visible light irradiation ( $\lambda \geq 420$  nm).

**Table S1:** Surface and bulk nitrogen concentration of N-TiO<sub>2</sub>(4) calcined at various temperatures.

| Calcination<br>temperature (K) | concentration of substituted N (%) |                   |
|--------------------------------|------------------------------------|-------------------|
|                                | Surface <sup>a</sup>               | Bulk <sup>b</sup> |
| before calcination             | 5.95                               | 6.00              |
| 473                            | 3.75                               | 6.00              |
| 673                            | 2.15                               | 5.95              |
| 773                            | 0.00                               | 2.25              |

<sup>a</sup>Estimated from XPS peak areas of Ti 2p and N 1s for the top surface of the N-TiO<sub>2</sub>(4) thin films. <sup>b</sup>Estimated from XPS peak areas of Ti 2p and N 1s for N-TiO<sub>2</sub>(4) thin films etched by Ar<sup>+</sup> ion sputtering for 5 min.
